# Supplementary material for: Best Evidence to Best Practice: Implementing an Innovative Model of Nutrition Care for Patients with Head and Neck Cancer Improves Outcomes
Source: PubMed Central journal article supplement (PMC7284331; doi:10.3390/nu12051465), 2020-05-19
Supplement: nutrients-12-01465-s001.pdf [file nutrients-12-01465-s001.pdf]

**Supplementary Table S1.** Team-level evaluation—multidisciplinary team focus group semi-structured question schedule.

| <b>Question Schedule</b> |                                                                                                                                                                                                                                                                                                                                                                                                                                                                                                                                                                                                               |
|--------------------------|---------------------------------------------------------------------------------------------------------------------------------------------------------------------------------------------------------------------------------------------------------------------------------------------------------------------------------------------------------------------------------------------------------------------------------------------------------------------------------------------------------------------------------------------------------------------------------------------------------------|
| 1.                       | What are your overall impressions of the new nutrition care strategies that have been put in place as part of the new model of care?                                                                                                                                                                                                                                                                                                                                                                                                                                                                          |
| 2.                       | How did you find the Supportive Care-Led Pre-Treatment Clinic? <ol style="list-style-type: none"><li>a. Were there any benefits? Drawbacks?</li><li>b. Were there any barriers? Facilitators?</li><li>c. Do you feel this was an appropriate strategy for this group of patients?</li><li>d. Is this something you would be happy to adopt as standard care?</li><li>e. Is the pre-treatment clinic offered at the right time?</li><li>f. Can you tell me a little bit about your experience with using the nutrition assessment tool (PG-SGA <sup>a</sup>)?</li><li>g. Did that change over time?</li></ol>  |
| 3.                       | How did you find the Nutrition Care Dashboard? <ol style="list-style-type: none"><li>a. Were there any benefits? Drawbacks?</li><li>b. Were there any barriers? Facilitators?</li><li>c. Do you feel this was an appropriate strategy for this group of patients?</li><li>d. Is this something you would be happy to adopt as standard care?</li><li>e. How useful is it having nutrition outcome measures (weight change, PG-SGA) available in real-time?</li><li>f. Can you tell me a little bit about your experience with having the new dietitian documents available in the eMR <sup>b</sup>?</li></ol> |
| 4.                       | Have you changed your practice as a result of the new nutrition care strategies? <ol style="list-style-type: none"><li>a. In what ways?</li><li>b. Was there anything particularly helpful/not helpful?</li><li>c. Has there been any impact on your professional practice, e.g., confidence?</li></ol>                                                                                                                                                                                                                                                                                                       |
| 5.                       | What is your sense of how these strategies have impacted on patients'/caregivers' experience? <ol style="list-style-type: none"><li>a. Can you give any examples?</li><li>b. How acceptable do you think the new model of care is to patients/caregivers?</li></ol>                                                                                                                                                                                                                                                                                                                                           |
| 6.                       | What are your impressions of how sustainable these strategies are in the longer term? <ol style="list-style-type: none"><li>a. Are there any risks of it not continuing?</li><li>b. What do you think are the main benefits of it continuing?</li><li>c. Do you feel there is a sense of ownership for these strategies within the MDT?</li><li>d. Is there clinical leadership in place for sustaining these strategies into the future?</li></ol>                                                                                                                                                           |
| 7.                       | Do you have any other comments or thoughts you'd like to share? <ol style="list-style-type: none"><li>a. Do you have any suggestions as to how to improve the model of care?</li><li>b. Is there anything you think worked well/didn't work well?</li></ol>                                                                                                                                                                                                                                                                                                                                                   |

<sup>a</sup>PG-SGA = Patient-Generated Subjective Global Assessment; <sup>b</sup>eMR = electronic medical record.
